# Supplementary material for: A Point-of-Care Faecal Test Combining Four Biomarkers Allows Avoidance of Normal Colonoscopies and Prioritizes Symptomatic Patients with a High Risk of Colorectal Cancer
Source: MDPI journal article supplement (doi:10.3390/cancers15030721), 2023-01-24
Supplement: s1 [file s1]

**Table S1.** Median values of FIT and FC results in each diagnosis considered in the study.

|                                    | <b>FIT</b><br><b>Median (IQR) µg/g</b> | <b>p value</b>                                                                                                                       | <b>FC</b><br><b>Median (IQR) µg/g</b> | <b>p value</b>                                                                                                                   |
|------------------------------------|----------------------------------------|--------------------------------------------------------------------------------------------------------------------------------------|---------------------------------------|----------------------------------------------------------------------------------------------------------------------------------|
| Significant Pathology              | 17.19 (90.13)                          |                                                                                                                                      | 82.23 (106.73)                        |                                                                                                                                  |
| No Significant Pathology           | 0.5 (2.90)                             | <b>&lt; 0.01</b>                                                                                                                     | 43.79 (90.87)                         | <b>&lt; 0.001</b>                                                                                                                |
| Colorectal Cancer                  | <b>67.87</b> (539.83)                  | 0.278 CRC vs IBD<br><b>0.01 CRC vs ARS<sup>1</sup></b><br><b>&lt; 0.01 CRC vs ANRS<sup>2</sup></b><br><b>&lt; 0.01 CRC vs Normal</b> | 121.13 (114.19)                       | 0.126 CRC vs IBD<br><b>0,04 CRC vs ARS<sup>1</sup></b><br><b>0,01 CRC vs ANRS<sup>2</sup></b><br><b>&lt; 0.001 CRC vs Normal</b> |
| Inflammatory Bowel Disease         | 30.4 (120.3)                           | <b>0.024 IBD vs ARS<sup>1</sup></b><br><b>&lt; 0.01 IBD vs ANRS<sup>2</sup></b><br><b>&lt; 0.01 IBD vs Normal</b>                    | <b>149.95</b> (390.31)                | <b>0,001 IBD vs ARS<sup>1</sup></b><br><b>0,005 IBD vs ANRS<sup>2</sup></b><br><b>&lt; 0.001 IBD vs Normal</b>                   |
| Adenoma Requiring Surveillance     | 9.6 (42.59)                            | <b>&lt; 0.01 ARS<sup>1</sup> vs ANRS<sup>2</sup></b><br><b>&lt; 0.01 ARS<sup>1</sup> vs Normal</b>                                   | 64.33 (111.87)                        | 0.309 ARS <sup>1</sup> vs ANRS <sup>2</sup><br><b>0.043 ARS<sup>1</sup> vs Normal</b>                                            |
| Adenoma Not Requiring Surveillance | 0 (1.9)                                |                                                                                                                                      | 49.55 (90.69)                         |                                                                                                                                  |
| Normal Colonoscopies               | 0.5 (2.90)                             | 0,106 ANRS <sup>2</sup> vs Normal                                                                                                    | 43.25 (85.93)                         | 0.268 ANRS <sup>2</sup> vs Normal                                                                                                |

<sup>1</sup> ARS: adenoma requiring surveillance.

<sup>2</sup> ANRS: adenoma not requiring surveillance.

**Table S2.** Diagnostic accuracy of FIT, FC, and the extreme results of the combined POC test for diagnosis of significant pathology stratified by presenting symptom.

| Symptom                                  | Test    | True Positives | False Negatives | Sensitivity | Specificity | PPV    | NPV   |
|------------------------------------------|---------|----------------|-----------------|-------------|-------------|--------|-------|
| Rectal bleeding<br>(n = 36/165)          | FIT     | 25             | 11              | 69.4%       | 88.4%       | 62.5%% | 91.2% |
|                                          | FC      | 24             | 12              | 66.7%       | 61.2%       | 32.4%  | 86.8% |
|                                          | ≥1 test | 33             | 3               | 91.7%       | 44.5%       | 31.7%  | 95.1% |
|                                          | 4 tests | 11             | 25              | 30.6%       | 97.7%       | 78.6%  | 83.4% |
| Chronic diarrhea<br>(n = 18/114)         | FIT     | 7              | 11              | 38.9%       | 90.6%       | 43.7%  | 88.8% |
|                                          | FC      | 9              | 9               | 50%         | 52.1%       | 16.4%  | 84.8% |
|                                          | ≥1 test | 13             | 5               | 72.2%       | 46.9%       | 20.3%  | 90%   |
|                                          | 4 tests | 4              | 14              | 22.2%       | 100%        | 100%   | 87.3% |
| Abdominal pain<br>(n = 17/97)            | FIT     | 10             | 7               | 58.8%       | 96.2%       | 76.9%  | 91.7% |
|                                          | FC      | 14             | 3               | 82.3%       | 56.2%       | 28.6%  | 94.7% |
|                                          | ≥1 test | 16             | 1               | 94.1%       | 57.5%       | 32%    | 97.9% |
|                                          | 4 tests | 4              | 13              | 23.5%       | 100%        | 100%   | 86%   |
| Change in bowel<br>habits<br>(n = 16/91) | FIT     | 9              | 7               | 56.2%       | 82.7%       | 40.9%  | 89.9% |
|                                          | FC      | 13             | 3               | 81.2%       | 57.3%       | 28.9%  | 93.5% |
|                                          | ≥1 test | 15             | 1               | 93.8%       | 36%         | 23.8%  | 96.4% |
|                                          | 4 tests | 3              | 13              | 18.8%       | 98.7%       | 75%    | 85.1% |
| Anemia /<br>Iron deficiency<br>(n=29/89) | FIT     | 16             | 13              | 55.2%       | 81.7%       | 59.3%  | 79%   |
|                                          | FC      | 22             | 7               | 75.9%       | 35%         | 36.1%  | 75%   |
|                                          | ≥1 test | 28             | 1               | 96.5%       | 26.7%       | 38.9%  | 94.1% |
|                                          | 4 tests | 6              | 23              | 20.7%       | 96.7%       | 75%    | 71.6% |

**Table S3.** Diagnostic accuracy of FIT, FC, and the extreme results of the combined POC test for diagnosis of CRC stratified by presenting symptom.

| Symptom                                 | Test    | True Positives | False Negatives | Sensitivity | Specificity | PPV   | NPV   |
|-----------------------------------------|---------|----------------|-----------------|-------------|-------------|-------|-------|
| Rectal bleeding<br>(n = 7/165)          | FIT     | 7              | 0               | 100%        | 79.1%       | 17.5% | 100%  |
|                                         | FC      | 6              | 1               | 85.7%       | 56.9%       | 8.1%  | 98.9% |
|                                         | ≥1 test | 7              | 0               | 100%        | 38.6%       | 6.7%  | 100%  |
|                                         | 4 tests | 6              | 1               | 85.7%       | 94.9%       | 42.8% | 99.3% |
| Chronic diarrhea<br>(n = 3/114)         | FIT     | 3              | 0               | 100%        | 88.3%       | 18.8% | 100%  |
|                                         | FC      | 2              | 1               | 66.7%       | 52.3%       | 3.7%  | 98.3% |
|                                         | ≥1 test | 3              | 0               | 100%        | 45.1%       | 4.7%  | 100%  |
|                                         | 4 tests | 1              | 2               | 33.3%       | 97.3%       | 25%   | 98.2% |
| Abdominal pain<br>(n = 6/97)            | FIT     | 5              | 1               | 83.3%       | 91.2%       | 38.5% | 98.8% |
|                                         | FC      | 5              | 1               | 83.3%       | 51.7%       | 10.2% | 97.9% |
|                                         | ≥1 test | 6              | 0               | 100%        | 51.7%       | 12%   | 100%  |
|                                         | 4 tests | 2              | 4               | 33.3%       | 97.8%       | 50%   | 95.7% |
| Change in bowel<br>habits<br>(n = 5/91) | FIT     | 3              | 2               | 60%         | 77.9%       | 13.6% | 97.1% |
|                                         | FC      | 4              | 1               | 80%         | 52.3%       | 8.9%  | 97.8% |
|                                         | ≥1 test | 5              | 0               | 100%        | 32.6%       | 7.9%  | 100%  |
|                                         | 4 tests | 2              | 3               | 40%         | 97.7%       | 50%   | 96.6% |
| Anemia /<br>Iron deficiency<br>(n=8/89) | FIT     | 5              | 3               | 62.5%       | 72.8%       | 18.5% | 95.2% |
|                                         | FC      | 7              | 1               | 87.5%       | 33.3%       | 11.5% | 96.4% |
|                                         | ≥1 test | 8              | 0               | 100%        | 21%         | 11.1% | 100%  |
|                                         | 4 tests | 4              | 4               | 50%         | 95.1%       | 50%   | 95.1% |

**Table S4.** AUCs (95%CI) of FIT, FC and each biomarker of the combined POC faecal test and its combination for the diagnosis of CRC, IBD and adenoma requiring surveillance.

|                           | <b>Colorectal<br/>Cancer</b>         | <b>Inflammatory<br/>Bowel Disease</b> | <b>Adenoma Requiring<br/>Surveillance</b> |
|---------------------------|--------------------------------------|---------------------------------------|-------------------------------------------|
| FIT                       | 0.838<br>(0.742-0.934)               | 0.859<br>(0.798-0.920)                | <b>0.709</b><br><b>(0.637-0.780)</b>      |
| FC                        | 0.725<br>(0.635-0.816)               | 0.803<br>(0.678-0.928)                | 0.545<br>(0.466-0.624)                    |
| FIT or FC                 | 0.775<br>(0.694-0.856)               | 0.807<br>(0.690-0.925)                | 0.581<br>(0.507-0.654)                    |
| hHb                       | 0.832<br>(0.758-0.905)               | 0.857<br>(0.778-0.936)                | 0.691<br>(0.610-0.772)                    |
| hTf                       | 0.707<br>(0.601-0.815)               | 0.735<br>(0.595-0.876)                | 0.593<br>(0.508-0.679)                    |
| hCp                       | 0.685<br>(0.607-0.762)               | 0.714<br>(0.626-0.802)                | 0.574<br>(0.496-0.652)                    |
| hLf                       | 0.746<br>(0.639-0.853)               | 0.911<br>(0.834-0.986)                | 0.489<br>(0.408-0.507)                    |
| Combination<br>of 4 tests | <b>0.872</b><br><b>(0.815-0.929)</b> | <b>0.942</b><br><b>(0.911-0.974)</b>  | 0.673<br>(0.599-0.747)                    |
